# Supplementary material for: Butterfly eyespot color pattern formation requires physical contact of the pupal wing epithelium with extracellular materials for morphogenic signal propagation
Source: BMC Dev Biol. 2020 Mar 31;20:6. doi: 10.1186/s12861-020-00211-7 (PMC7110832; doi:10.1186/s12861-020-00211-7)
Supplement: Supplementary file 1 — Additional file 1: Table S1. Eyespot change scores for treatments. Table S2. Eyespot change percentages and contact angles for materials. Table S3. Eyespot size change ratios for treatments. [file 12861_2020_211_MOESM1_ESM.xlsx]

## Sheet:  Table S1 Eyespot change scores
	Table S1. Eyespot change scores for treatments
			Number of individuals (n)			Change score
	Mode#	Treatment mode	No change	Enlargement	Reduction	Mean	SE
	1	glass plate	7	12	2	0.381	0.161
	2	plastic film	25	12	1	0.289	0.084
	3	transient lift	25	15	2	0.3095	0.086807
	4	semiparabiosis	10	4	2	0.25	0.112
	5	polyLysine	3	11	7	0.19	0.203
	6	aluminum foil	27	16	10	0.1132	0.09585
	7	plastic plate	18	4	1	0.1304	0.0954
	8	collagen type I	6	11	10	0.037	0.173
	9	gelatin	18	9	19	-0.21739	0.111698
	10	fibronectin	14	6	6	0	0.136
	11	no treatment	19	0	0	0	0
	12	alumina file	7	10	29	-0.413	0.1126
	13	water-saturated gelatin	11	1	19	-0.5806	0.1013
	14	silicone-glassine paper	1	0	25	-0.96153	0.0384
	15	copy paper	0	0	42	-1	0
	16	medical adhesive tape	0	0	20	-1	0
	17	no contact	0	0	19	-1	0

## Sheet: Table S2 Eyespot change (%) 
	Table S2. Eyespot change percentages and contact angles for materials
			Change (%)
	Mode#	Treatment mode	No change	Enlargement	Reduction	Angle
	1	plastic film	65.79	31.58	2.63	64.79
	2	plastic plate	78.26	17.39	4.35	95.3
	3	glass plate	33.33	57.14	9.52	23.16
	4	aluminum foil	50.94	30.19	18.87	108.46
	5	polyLysine	14.29	52.38	33.33	67.59
	6	collagen type I	22.22	40.74	37.04	65.05
	7	fibronectin	53.85	23.08	23.08	86.12
	8	gelatin	39.13	19.57	41.3	69.37
	9	alumina file	15.22	21.74	63.04	109.01
	10	medical adhesive tape	0	0	100	119.29
	11	silicone-glassine paper	3.85	0	96.15	112.75
	12	copy paper	0	0	100	110.55
	13	semiparabiosis	62.5	25	12.5	91.14

## Sheet: Table S3 Eyespot size change
	Table S3. Eyespot size change ratios for treatments
		no treatment		medical adhesive tape		aluminum foil		copy paper		transient lift		alumina file		semiparabiosis		no contact		water-saturated gelatin		fibronectin		polyLysine		collagen type I		gelatin		plastic plate		plastic film		silicone-glassine paper		glass plate
1		0.996169		0.570948		0.941828		0.692443		0.987152		1.02422		1.04229		0.706001		0.833229		0.859284		1.04598		0.962851		1.02607		1.45949		1.13967		0.663978		1.20535
2		1.0188		0.527763		0.926829		0.635162		1.05145		1.10409		1.06555		0.916212		0.896159		0.981988		0.974412		0.792029		1.1488		0.962133		0.924929		0.627876		1.31984
3		0.952269		0.727621		0.779614		0.490934		1.00189		1.19032		1.07726		0.512859		0.962721		1.48801		0.961956		0.996619		1.1095		1.06314		1.06043		0.733834		0.852027
4		0.994901		0.75557		1.68441		0.122549		0.973665		1.14658		0.659394		0.757469		0.831801		0.993659		0.995702		0.643687		0.840139		1.04655		0.960938		0.649894		1.01292
5		1.00868		0.902469		0.971902		0.320717		1.15262		0.771265		1.03955		0.65981		0.744463		0.90218		1.05267		0.874562		0.956463		1.31626		0.916339		0.628529		1.00557
6		1		0.841646		1.19439		0.433239		1.06803		1.17995		1.01963		0.639695		0.747785		0.764431		1.0314		0.960206		1.03165		1.04285		1.08717		0.711972		1.01177
7		0.992883		0.685911		1.04973		0.187135		1.13899		1.21207		0.997593		0.814295		0.963323		1.15946		1.08847		1.317		0.937838		0.977234		0.99116		0.50134		1.03044
8		0.991312		0.48847		1.05187		0.408851		1.12234		1.13288		1.00198		0.783103		0.76868		1.09787		0.981046		0.73072		0.881231		1.01618		1.05552		0.816277		0.956803
9		1.02311		0.612761		1.08096		0.621118		1.3045		0.68697		0.987677		0.808362		0.789644		1.00299		1.06227		1.32627		1.09976		1.01432		1.09426		0.59985		1.03876
10		1.0035		0.74365		1.07703		0.810771		1.09325		0.836212		1.05396		0.968473		0.831981		0.946439		0.934842		0.793333		1.39119		0.960059		1.01813		0.746622		0.974321
11		1.00953		0.755427		1.71021		0.782794		1.06475		0.341494		1.16		0.8206		0.892768		0.975639		1.05248		0.924203		0.996318		1.06829		1.06213		0.594112		1.06931
12		0.944765		0.771379		1.70849		0.918067		1.14246		0.95188		1.00498		0.913844		0.613715		0.979224		1.26465		0.931883		0.950987		0.959259		1.11349		0.646844		1.12357
13		1.01674		0.823368		2.15134		0.551031		1.09103		0.554348		1.05133		0.600151		1.0892		1.03415		1.26129		1.46667		0.833789		0.986035		1.02595		0.615651		0.9594
14		1.00542		0.588473		1.24305		0.745668		1.15279		0.812233		1.052		0.809201		0.756853		1.15709		1.30625		1.05038		1.14692		1.06177		1.00894		0.720588		1.44342
15		1.02955		0.8388		1.03966		0.846764		1.03655		0.615321		0.978567		0.69464				1.15164		1.08505		1.06367		0.853459		0.951219		1.02107		0.898363		1.21771
16		0.983827		0.479554		1.45114		0.560561		1.11839		0.589877				0.797911	mean	0.837309		1.03235		1.08045		1.11429		1.02681		1.06464		1.05166		0.850383		1.04466
17		0.973498		0.924718		1.47035		0.742094		0.974661		0.732639	mean	1.01278		0.505981	sd	0.118242		1.01648		1.16021		1.0708		0.830462		1.0082		1.06193		0.770981		1.80067
18		0.986604		0.49803		1.16667		0.627986		1.16594		0.910508	sd	0.107591		0.586398				0.976716		1.14855		0.791453		0.809455		1.01997		1.02076		0.861758		1.06106
19		1.05152				0.822814		0.817222		0.95466		0.792407								1.03039		1.08711		0.539568		0.796863		1.0625		1.02053		0.559767		1.37515
20						1.02711		0.749837		1.0131		1.15146			mean	0.738611				1.01213		1.24928		1.33883		1.11291		1.00987		1.00143		0.870854		1.29647
21	mean	0.99911	mean	0.696475		0.974831		0.701351		1.06883		0.682669			sd	0.134961				0.628754		1.13122		0.879875		1.05206		1.07825		1.04549		0.70297		1.31218
22	sd	0.0253059	sd	0.145611		1.11262		0.746683		1.06435		0.771108								0.936239	mean	1.09311		1.08562		1.09992		0.980635		1.02669		0.535559
23						1.00775		0.92623		1.00948		0.672624								0.893993	sd	0.106182		1.47789		0.899942		1.09151		1.06662		0.794897	mean	1.14816
24						1.05319		0.591884		1.04877		1.02703								0.988134				1.23452				1		1.12835		0.437919	sd	0.217863
25						0.980471		0.805207		1.00378		0.711712								0.959143				1.3619	mean	0.992719				1.07384		0.41433
26						1.01839		0.578704		0.982237		0.546965												1.0444	sd	0.144378	mean	1.05002		1.02009
27						1.03523		0.604813		1.03224		0.846832							mean	0.998736				1.3508			sd	0.114086		1.09066	mean	0.678206
28						0.932217		0.714505		0.962217		0.651395							sd	0.15397										1.07692	sd	0.132078
29						0.985222		0.915805		1.01055		0.730897											mean	1.04163						0.997205
30						0.991777		0.794564		0.92163		0.845949											sd	0.251806						1.10146
31						0.877248		0.404922		1.00286																				1.02877
32						0.995004		0.671594		0.969732	mean	0.840797																		1.01466
33						0.901368		0.609865		1.03386	sd	0.227649																		0.989046
34						1.02179		0.484447		1.04066																				1.07451
35						1.0284		0.612113		1.02216																				1.06234
36						0.998205		0.859365		1.03755																				1.08447
37						0.92587				1.00561																				1.07416
38						0.925532	mean	0.641305		0.986082																				1.00721
39						0.810219	sd	0.193668		0.974583
40						0.95451				0.594619																			mean	1.04208
41						0.990437																							sd	0.0500229
42						1.00997			mean	1.0345
43						0.955642			sd	0.10286
44						0.640804
45						0.878371
46						0.757504
47						0.893996
48						0.781961
49						0.880286
50						0.840836
					mean	1.05418
					sd	0.275308
